# Supplementary material for: Boswellic acid and myrrh sesquiterpene alleviate hypoxic-ischemic brain injury via regulating TLR4/NF-κB and Ang Ⅰ/Ang Ⅱ/Tie signaling pathway on MCAO rats
Source: Research Square preprint supplement (doi:10.21203/rs.3.rs-105919/v1), 2020-11-12
Supplement: Supplementary file 1 [file 0020b3b00ad143b975543bce.docx]

**Boswellic acid and myrrh sesquiterpene alleviate hypoxic-ischemic brain injury via regulating TLR4/NF-κB and Ang Ⅰ/Ang Ⅱ/Tie signaling pathway on MCAO rats**

Xiao Dong Miao1,2,3,a, Zi Zhang Zhao 1,2,a, Zhuo Xu 1,2,a, Shu Lan Su1,2,*, Bao Ping Jiang2, Er-Xin Shang1,2, Jia Shang Li1,2, Yue Zhu1,2, Jian Ming Guo1,2, Li Yu2, Da Wei Qian1,2, Jin-Ao Duan1,2,*

(1 Jiangsu Key Laboratory for High Technology Research of TCM Formulae and Jiangsu Collaborative Innovation Center of Chinese Medicinal Resources Industrialization, Nanjing 210023, China; 2 Nanjing University of Chinese Medicine, Nanjing 210023, China; 3 Jiangxi Academy of Traditional Chinese Medicine, Jiangxi 330077, China)

*Corresponding authors at: Jiangsu Collaborative Innovation Center of Chinese Medicinal Resources Industrialization, Nanjing University of Chinese Medicine, Nanjing 210023, PR China

E-mail addresses: sushulan1974@163.com (S.L. Su); [duanja@163.com](mailto:duanja@163.com) (J.A. Duan)

Tel. / fax: +86 25 85811917 (S.L. Su); +86 25 85811291 (J.A. Duan)

a: These authors contributed equally to this work.

**1. Materials**

Frankincense is a resin that exudes from *Bowiellia carteri* Birdw and myrrh is a dried resin of *Commiphora myrrh* Engl. They were identified by Professor Duan Jin-ao of Nanjing University of Traditional Chinese Medicine. [Nimodipine](file:///C:/Users/Administrator/AppData/Local/youdao/dict/Application/8.8.0.0/resultui/html/index.html#/javascript:;) was purchased from Shandong Xinhua Pharmaceutical Company Limited ([lot number](file:///C:/Users/Administrator/AppData/Local/youdao/dict/Application/8.8.0.0/resultui/html/index.html#/javascript:;): 1810243). SPF-grade SD rats (male, 6-7 weeks) were procured from Shanghai slack laboratory animal co. LTD (License No: SCXK（Hu）2017-0005).Small vertical electrophoresis tank (Bio-Rad), small Trans-Blot transfer tank (Bio-Rad), basic power supply (Bio-Rad). Anke LXJ-IIB type and TDL-240B centrifuge was purchased from Shanghai Anting Scientific Instrument Factory (China, Shanghai); EPED ultra-pure water machine was purchased from Nanjing Yeap Esselte Technology Development Co., Ltd (China, Nanjing).

**2. Preparation of drug solution**

BA preparation: Frankincense were extracted four times with 20 times amount of 95 % ethanol, 1 h each time. Supernatants combined and evaporated to obtain [dry extract](http://dict.cnki.net/dict_result.aspx?searchword=%e5%b9%b2%e6%b5%b8%e8%86%8f&tjType=sentence&style=&t=dry+extract)s. Then BA was obtained by alkali-soluble acid precipitation, and 0.2 g of BA can be obtained with 1 g of frankincense. The BA content was 73.87%. BA mainly contains 3-oxotirucall-8,24-dien-21-oic acid, 3α-acetoxy-tirucall-7, 24-dien-21-oic acid, 3-hydroxytirucall-8,24-dien-21-oic acid, acetyl 11*α*-methoxy-β-boswellic acid, 3α-hydroxy tirucall-7,24-dien-21- oic acid, 11-keto-boswellic acid, 3-*O*-acetyl-*α-*boswellic acid, 3*α*-acetyloxylanosta -8,24-dien-21-oic acid, 3*β*-acetoxy-5*α*-lanosta-8,24- dien-21-oic acid, 3-acetyl-11-keto-*β*-boswellic acid, 3-acetyloxy-tirucall-8,24-dien-21-oic acid, α-boswellic acid, *β*-boswellic acid.

MS preparation: Myrrh were extracted twice with 7 times amount of 92 % ethanol, 2.5 h each time. Supernatants combined and evaporated to obtain [dry extract](http://dict.cnki.net/dict_result.aspx?searchword=%e5%b9%b2%e6%b5%b8%e8%86%8f&tjType=sentence&style=&t=dry+extract)s. Then the ethyl acetate extract was purified by silica gel column chromatography to obtain MS, and about 0.2 g of MS can be obtained with 1 g of myrrh. The content of MS is about 61%, mainly including 2-methoxy-8, 12-epoxygermacra-1(10), 7, 11-trien-6-one, 2-methoxy-5-acetoxy- fruranogermacr -1(10) -en-6-one, etc.

**3.**[**Animal**](file:///C:/Users/Administrator/AppData/Local/youdao/dict/Application/8.8.0.0/resultui/html/index.html#/javascript:;)[**experiment**](file:///C:/Users/Administrator/AppData/Local/youdao/dict/Application/8.8.0.0/resultui/html/index.html#/javascript:;)

Scoring criteria: 0 score: no symptoms; 1 score: the forelimb of the injured brains contralateral side cannot be straightened when lifting the tail; 2 score: rotating to the damage side; 3 score: tip to the opposite side; 4 score: can not walk spontaneously and consciousness is not clear; 5 score: death.

**4. Metabolomics study on** **[plasma](C:/Users/Administrator/AppData/Local/youdao/dict/Application/8.7.0.0/resultui/html/index.html" \l "/javascript:;) and urine**

An equal amount of plasma/urine from each sample were mixed together as a quality control (QC) sample. QC samples are continuously injected for 6 times to adjust the system balance before sampling, and injected once again between the two groups to monitor the stability of analysis.

The separation was performed on an ACQUITY UPLC BEH C18 column (2.1 mm × 100 mm, 1.7 *μ*m) which was maintained at 35 °C, and mobile phase was composed of 0.1% formic acid solution (A) and acetonitrile (B) at a flow rate of 0.4 mL/min. For [plasma](file:///C:/Users/Administrator/AppData/Local/youdao/dict/Application/8.7.0.0/resultui/html/index.html#/javascript:;) analysis, the gradient elution conditions were as follows:0-3 min, 5-50 % B; 3-7 min, 50-60 % B; 7-10 min, 60-70 % B; 10-14 min, 70-95 % B; 14-16.5 min, 95 % B; 16.5-20 min, 95-5 % B. For urine analysis, the gradient elution conditions were as follows: 0.0~8.0 min, 5~30% B; 8.0~11.0 min, 30~70% B; 11.0~13.0 min, 70%~95% B; 13.0~14.0 min, 95% B; 14.0~15.0 min, 95%~5% B.

ESI mass spectra were acquired in both positive and negative ionization modes by scanning over the *m/z* range 100~1000 Da. The conditions were as follows: extraction voltage: 2.0 V, cone voltage: 30 V, capillary voltage: 3.0 kV, collision energy: 20~50 eV, ion source temperature: 120 °C, desolvation temperature: 350 °C, cone gas flow rate: 50 L/h, and desolvation gas flow rate: 600 L/h. High purity nitrogen and leucine-enkephalin (ESI+: 556.2771 *m/z*, ESI-: 555.2615 *m/z*) were gas collision and locked mass solution, respectively.

**5. Metabolites of intestinal flora analysis**

Gas chromatographic condition: gas chromatograph (perkinelmer clams⑥ 680)- correlation Flame Ionization Detector (FID), Hp-5 capillary column（30m×0.25mm ×0.25 *μ*m; [number](http://dict.cnki.net/dict_result.aspx?searchword=%e5%8f%b7&tjType=sentence&style=&t=number): 19091S-433; Agilent Technologies), a channels sampling rate 12.5 pts/s, injection volume: 2 *μ*L, Carrier gas is helium, the shunt ratio was 10:1, the air flow rate was 400 mL/min and H2 flow rate was 40 mL/min, [injector temperature](http://dict.cnki.net/dict_result.aspx?searchword=%e8%bf%9b%e6%a0%b7%e5%8f%a3%e6%b8%a9%e5%ba%a6&tjType=sentence&style=&t=injector+temperature) at 250 °C, FID detector temperature at 250 °C, temperature programming: start temperature at 100 °C and keep for 2.5 min, then heat up to 230 °C at 50 °C/ min and hold for 2 min.

**
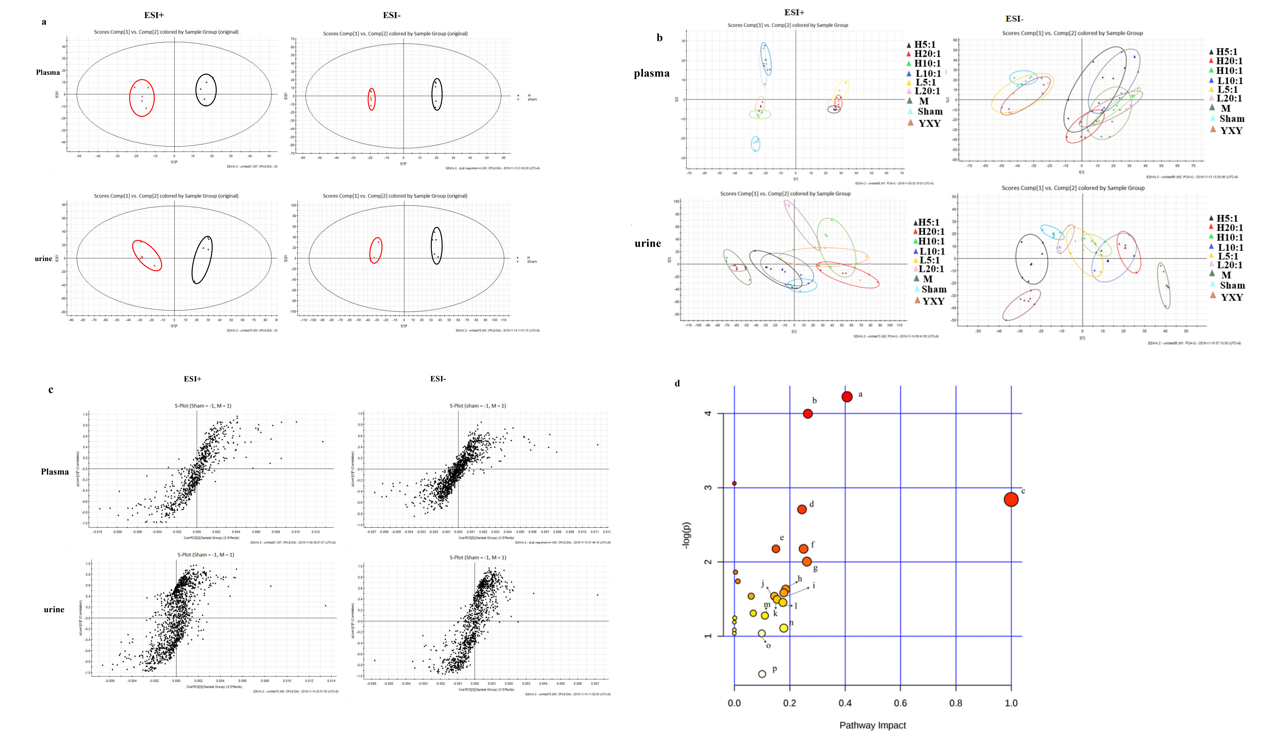
Figure Ⅰ** OPLS-DA model between sham and M rats in positive mode and negative mode (**a)**;PCA model results sham group, model group and drug groups rats in positive mode and negative mode (**b)**. S-plot polt for M vs. sham group in positive mode and negative mode(**c**). Metabolic pathways involved in all markers in plasma and urine (a. Retinol metabolism, b. Pentose and glucuronate interconversions, c. Linoleic acid metabolism, d. Glycerophospholipid metabolism, e. Biotin metabolism, f. Ascorbate and aldarate metabolism, g. Phenylalanine metabolism, h. Terpenoid backbone biosynthesis, i. Pantothenate and CoA biosynthesis, j. Ether lipid metabolism, k. Sphingolipid metabolism, l. Pyruvate metabolism, m. Galactose metabolism, n. Cysteine and methionine metabolism, o. Arachidonic acid metabolism, p. Steroid hormone biosynthesis) (**d).**

**
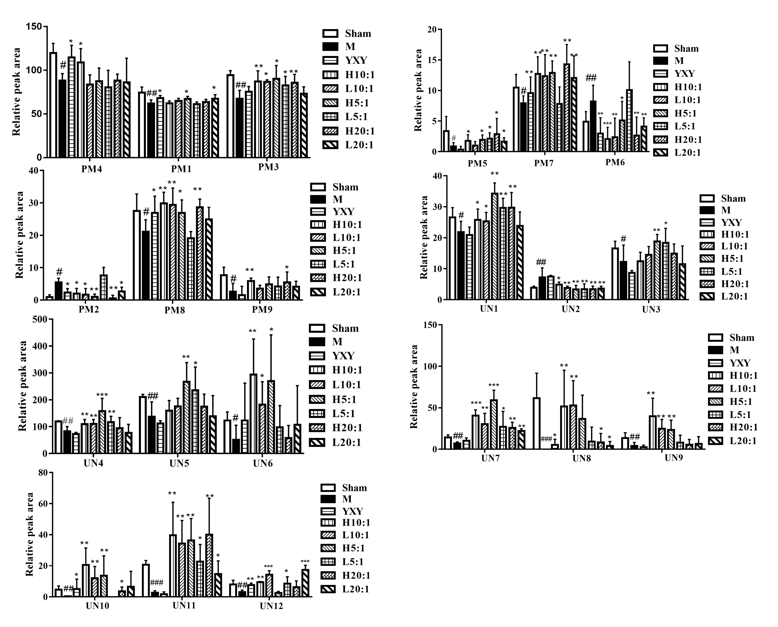
**

**Figure ⅠI** Relative peak area of potential biomarkers identified in plasma and urine in positive and negative ion mode by UPLC-QTOF/MS(**d)**. (#*P*< 0.05, ##*P*< 0.01, ###*P*< 0.001: model group *vs* control group; **P*< 0.05; ***P*< 0.01, ****P*< 0.001: administration groups *vs* model group. PM1: Sphinganine; PM2: Prostaglandin H2; PM3: LysoPC(O-18:0/0:0); PM4: Linoleic acid; PM5: 4'-Phosphopantothenoylcysteine; PM6: LysoPA(18:0/0:0); PM7: 17-Hydroxyprogesterone; PM8: Retinal; PM9: Retinyl ester; UN1: PE(18:4(6Z,9Z,12Z,15Z)/22:6(4Z,7Z,10Z,13Z,16Z,19Z)); UN2: LysoPA(16:0/0:0); UN3: Biocytin; UN4: LysoPA(0:0/18:1(9Z)); UN5: Deoxycholic acid 3-glucuronide; UN6: Isopentenyl pyrophosphate; UN7: L-Cystathionine; UN8: 2-Phenylethanol glucuronide; UN9: Alpha-Lactose; UN10: Phenylpyruvic acid; UN11: D-Glucuronic acid; UN12: S-Acetyldihydrolipoamide-E).


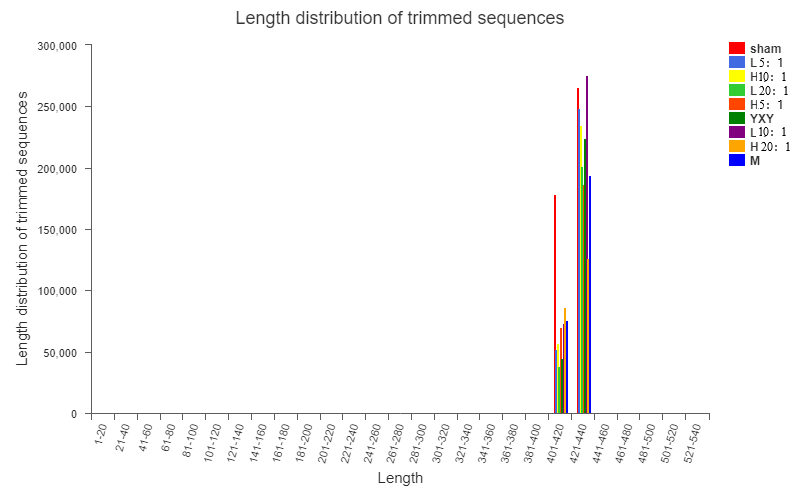


**Figure III** High quality distribution of the sample sequence length

**Figure IV** Diversity index (Sobs, Heip and Shannon index) (**a);** rarefaction curve (Sobs and Shannon index) of each group (**b)**

**
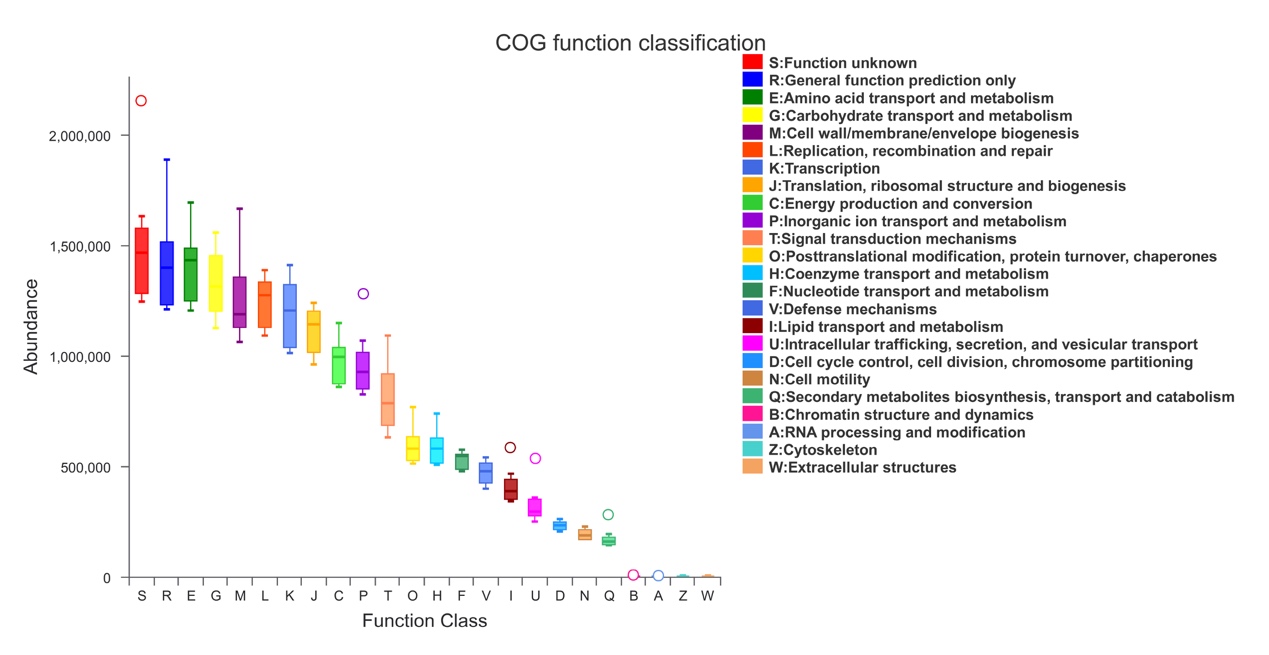
**

**Figure V** Function prediction of metabolites in intestinal flora


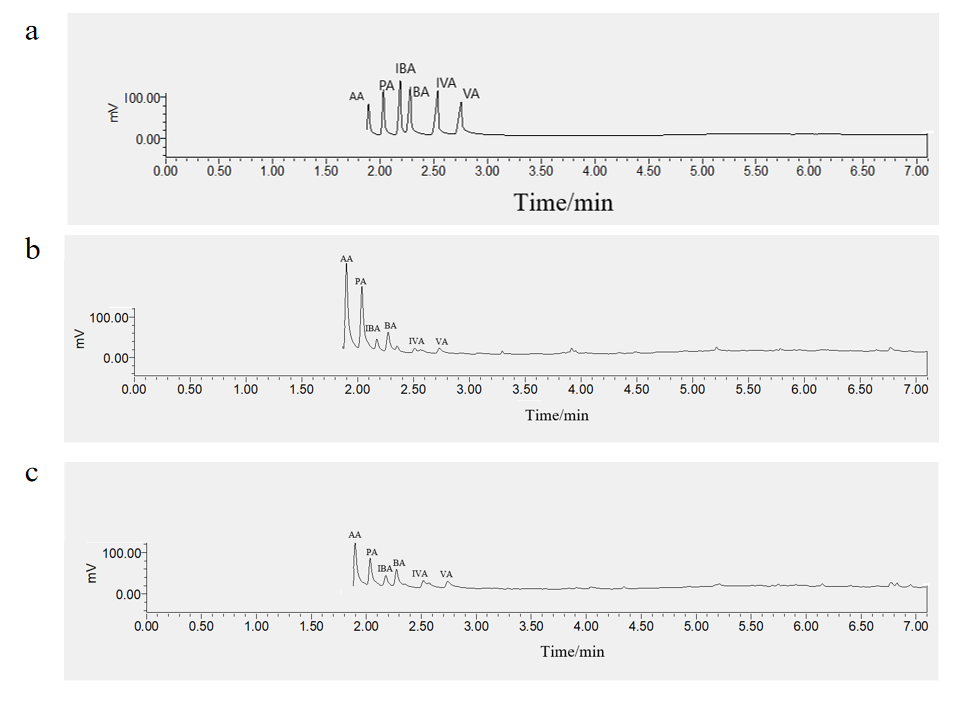


**Figure VI** The chromatogram of SCFAs (a: the mixed reference substances, b: Sham group, c: M group)

**Table Ⅰ** Potential metabolites selected and identified in plasma and urine

|  | tR/min | HMDB | Metabolite | molecular formula | M/Z | Trend | Ion mode | PubChem | KEGG | pathway name | impact |
| --- | --- | --- | --- | --- | --- | --- | --- | --- | --- | --- | --- |
| PM1 | 7.04 | HMDB0000269 | Sphinganine | C18H39NO2 | 302.31 | ↓ | [M+H]+ | 91486 | C00836 | Sphingolipid metabolism | 0.15 |
| PM2 | 3.74 | HMDB0001381 | Prostaglandin H2 | C20H32O5 | 353.23 | ↑ | [M+H]+ | 445049 | C00427 | Arachidonic acid metabolism | 0.10 |
| PM3 | 9.57 | HMDB0011149 | LysoPC(O-18:0/0:0) | C26H56NO6P | 510.39 | ↓ | [M+H]+ | 2733532 | C04317 | Ether lipid metabolism | 0.14 |
| PM4 | 12.88 | HMDB0000673 | Linoleic acid | C18H32O2 | 279.23 | ↓ | [M-H]- | 5280450 | C01595 | Linoleic acid metabolism | 1.00 |
| PM5 | 3.57 | HMDB0001117 | 4'-Phosphopantothenoylcysteine | C12H23N2O9PS | 401.08 | ↓ | [M-H]- | 440304 | C04352 | Pantothenate and CoA biosynthesis | 0.18 |
| PM6 | 5.57 | HMDB0007854 | LysoPA(18:0/0:0) | C21H43O7P | 437.27 | ↑ | [M-H]- | 9547179 | C00416 | Glycerophospholipid metabolism | 0.14 |
| PM7 | 13.29 | HMDB0000374 | 17-Hydroxyprogesterone | C21H30O3 | 329.21 | ↓ | [M-H]- | 6238 | C01176 | Steroid hormone biosynthesis | 0.10 |
| PM8 | 12.33 | HMDB0001358 | Retinal | C20H28O | 283.21 | ↓ | [M-H]- | 638015 | C00376 | Retinol metabolism | 0.25 |
| PM9 | 11.5 | HMDB0003598 | Retinyl ester | C20H30O2 | 301.22 | ↓ | [M-H]- | 5460164 | C02075 | Retinol metabolism | 0.16 |
| UN1 | 6.38 | HMDB0009210 | PE(18:4(6Z,9Z,12Z,15Z)/22:6(4Z,7Z,10Z,13Z,16Z,19Z)) | C45H70NO8P | 784.49 | ↓ | M+H | 52924469 | C00350 | Glycerophospholipid metabolism | 0.10 |
| UN2 | 3.5 | HMDB0007853 | LysoPA(16:0/0:0) | C19H39O7P | 411.25 | ↑ | M+H | 6419701 | C00416 | Glycerophospholipid metabolism | 0.14 |
| UN3 | 6.15 | HMDB0003134 | Biocytin | C16H28N4O4S | 373.19 | ↓ | M+H | 83814 | C05552 | Biotin metabolism | 0.15 |
| UN4 | 4.06 | HMDB0007851 | LysoPA(0:0/18:1(9Z)) | C21H41O7P | 437.27 | ↓ | M+H | 52929749 | C00416 | Glycerophospholipid metabolism | 0.14 |
| UN5 | 5.11 | HMDB0002596 | Deoxycholic acid 3-glucuronide | C30H48O10 | 569.33 | ↓ | M+H | 53477755 | C03033 | Pentose and glucuronate interconversions | 0.14 |
| UN6 | 3.15 | HMDB0001347 | Isopentenyl pyrophosphate | C5H12O7P2 | 245.00 | ↓ | M-H | 1195 | C00129 | Terpenoid backbone biosynthesis | 0.19 |
| UN7 | 9.95 | HMDB0000099 | L-Cystathionine | C7H14N2O4S | 221.06 | ↓ | M-H | 439258 | C02291 | Cysteine and methionine metabolism | 0.18 |
| UN8 | 6.29 | HMDB0010350 | 2-Phenylethanol glucuronide | C14H18O7 | 297.10 | ↓ | M-H | 24862077 | C03033 | Pentose and glucuronate interconversions | 0.14 |
| UN9 | 3.22 | HMDB0000186 | Alpha-Lactose | C12H22O11 | 341.11 | ↓ | M-H | 84571 | C00243 | Galactose metabolism | 0.11 |
| UN10 | 3.34 | HMDB0000205 | Phenylpyruvic acid | C9H8O3 | 163.04 | ↓ | M-H | 997 | C00166 | Phenylalanine metabolism | 0.26 |
| UN11 | 2.96 | HMDB0000127 | D-Glucuronic acid | C6H10O7 | 193.04 | ↓ | M-H | 444791 | C00191 | Ascorbate and aldarate metabolism | 0.25 |
| UN12 | 5.4 | HMDB0006878 | S-Acetyldihydrolipoamide-E | C10H19NO2S2 | 248.08 | ↓ | M-H | 24906332 | C16255 | Pyruvate metabolism | 0.18 |

**Table Ⅱ** the metabolic pathways in the top 20 of abundance values

| No | metabolic pathway | Abundance value |
| --- | --- | --- |
| 1 | Membrane Transport | 105692924 |
| 2 | Carbohydrate Metabolism | 88022887 |
| 3 | Amino Acid Metabolism | 80683073 |
| 4 | Replication and Repair | 75058735 |
| 5 | Energy Metabolism | 48214007 |
| 6 | Translation | 47475810 |
| 7 | Poorly Characterized | 44560931 |
| 8 | Cellular Processes and Signaling | 35077486 |
| 9 | Metabolism of Cofactors and Vitamins | 35035184 |
| 10 | Nucleotide Metabolism | 33769103 |
| 11 | Genetic Information Processing | 24154934 |
| 12 | Lipid Metabolism | 23596902 |
| 13 | Transcription | 22549380 |
| 14 | Metabolism | 22286325 |
| 15 | Glycan Biosynthesis and Metabolism | 20887654 |
| 16 | Folding, Sorting and Degradation | 20818946 |
| 17 | Enzyme Families | 18882988 |
| 18 | Cell Motility | 17376939 |
| 19 | Signal Transduction | 15725330 |
| 20 | Metabolism of Terpenoids and Polyketides | 14101934 |

**Table** **Ⅲ** Theprecision, stability, repeatability, average recovery and [linear](file:///C:/Users/Administrator/AppData/Local/youdao/dict/Application/8.8.0.0/resultui/html/index.html#/javascript:;) [relation](file:///C:/Users/Administrator/AppData/Local/youdao/dict/Application/8.8.0.0/resultui/html/index.html#/javascript:;) of six SCFAs components

| compound | RSD/%(n=6) | | | average recovery (%) | regression equation | R2 |
| --- | --- | --- | --- | --- | --- | --- |
| precision | stability | repeatability |
| Acetic acid | 5.36 | 6.18 | 9.98 | 110.65 | y=33180x-8660.3 | 0.9994 |
| Propionic acid | 6.68 | 4.01 | 9.03 | 106.00 | y=58215x-3212.5 | 0.9991 |
| Isobutyric acid | 6.61 | 3.38 | 9.04 | 108.37 | y=68937x+5402.8 | 0.9994 |
| Butyric acid | 7.53 | 9.04 | 8.70 | 113.33 | y=78466x-26242 | 0.9997 |
| Isovaleric acid | 6.75 | 6.33 | 9.48 | 108.15 | y=90551x-14885 | 0.9997 |
| Valeric acid | 7.41 | 2.64 | 2.80 | 116.39 | y=96891x-83710 | 0.9992 |
